# Supplementary material
Source: HighWire-hosted journal article supplement (http://thorax.bmjjournals.com/highwire/filestream/173910/field_highwire_adjunct_files/1/6210880fige2.pdf)

Figure 2 (online data supplement)

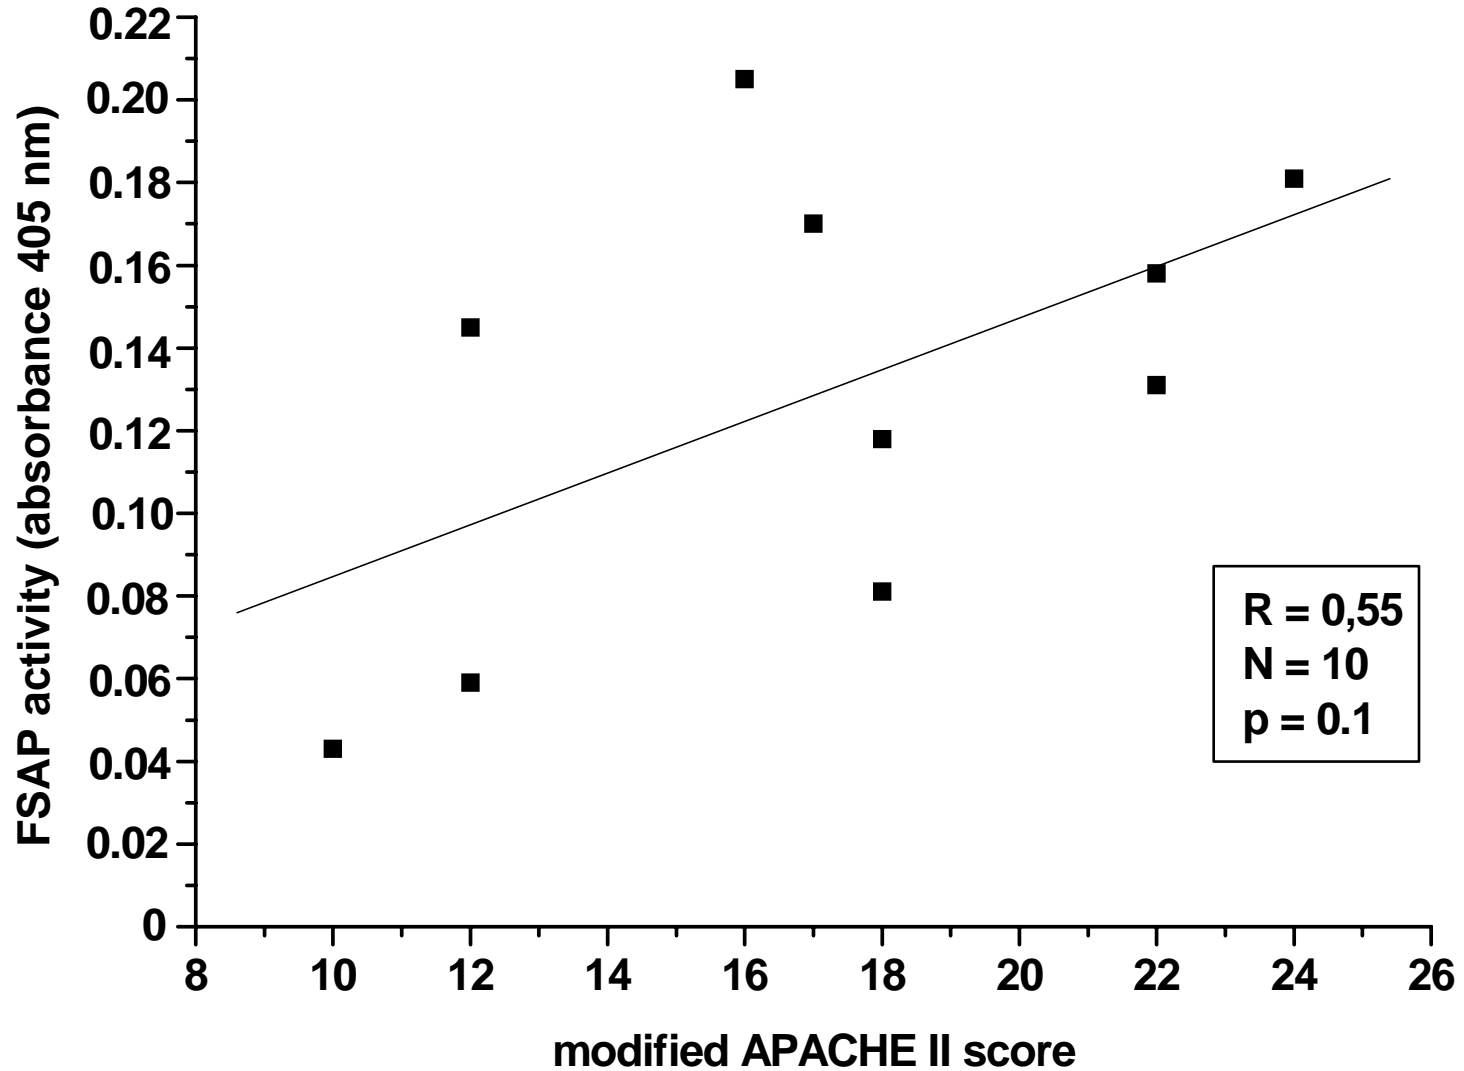

Supplement: 6210880fige2.pdf [file 6210880fige2.pdf]
